# Supplementary material for: Boron-enriched rice-like homologous carbon nanoclusters with a 51.5% photoluminescent quantum yield for highly sensitive determination of endogenous hydroxyl radicals in living cells
Source: Royal Society of Chemistry journal article supplement (doi:10.1039/d2tb02409h), 2023-01-01
Supplement: d2tb02409h1.pdf [file d2tb02409h1.pdf]

## Supporting Information

For

**Boron-enrichment Rice-homologous Carbon Nanoclusters with a 51.5%  
Photoluminescent Quantum Yield for Highly Sensitive Determination of  
Endogenous Hydroxyl Radical in Living Cells**

*Zhong-Xia Wang,<sup>\*a</sup> Lei Hu,<sup>a</sup> Xiao-Qiong Li,<sup>b</sup> Yi-Lei Jia,<sup>b</sup> Ting Wang,<sup>b</sup> and Wei Wang<sup>\*a</sup>*

*<sup>a</sup> School of Chemistry and Chemical Engineering, Yancheng Institute of Technology,  
Yancheng 224051, China.*

*<sup>b</sup> State Key Laboratory of Analytical Chemistry for Life Science, School of Chemistry  
and Chemical Engineering, Nanjing University, Nanjing 210023, China.*

***\*Corresponding authors.** (Z.X. Wang) Tel. (Fax): +86-515-88298186.*

*E-mail: Wei Wang: wangw@ycit.edu.cn;*

*Zhong-Xia Wang: wangzx198411@163.com.*

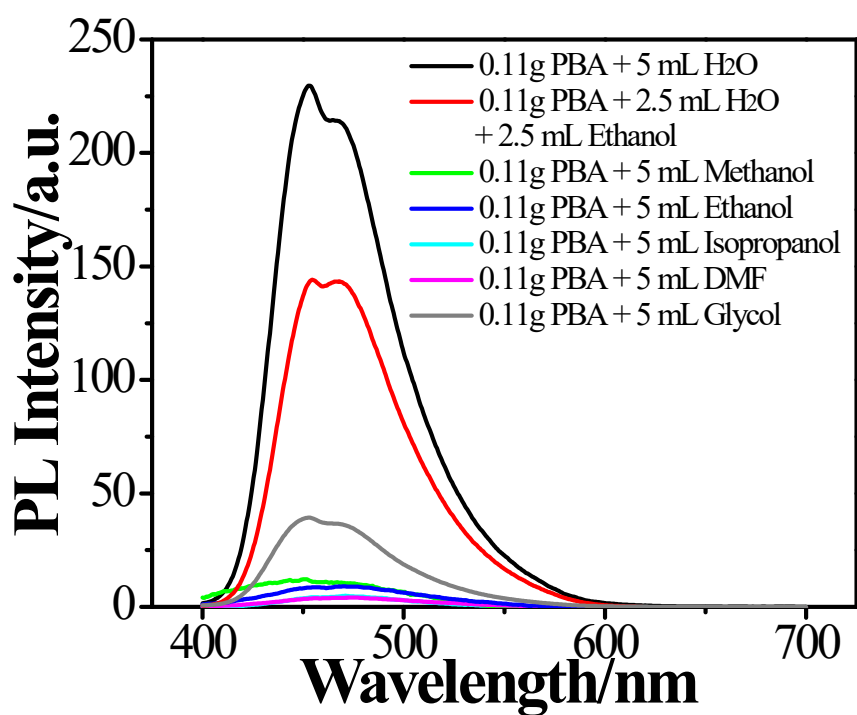

**Figure S1** Effect of the solvents (the mass of PBA precursor was all 110 mg) on the PL intensity of the carbon nanomaterial ( $\lambda_{\text{ex}}=390$  nm), and the excitation and emission slit widths were 10 nm and 1 nm, respectively.

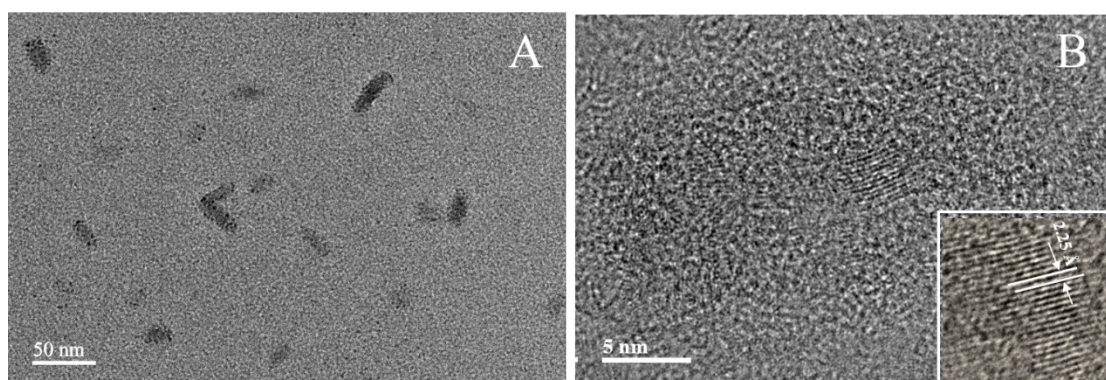

**Figure S2** TEM (A) and HRTEM (B) images of the BRCNs.

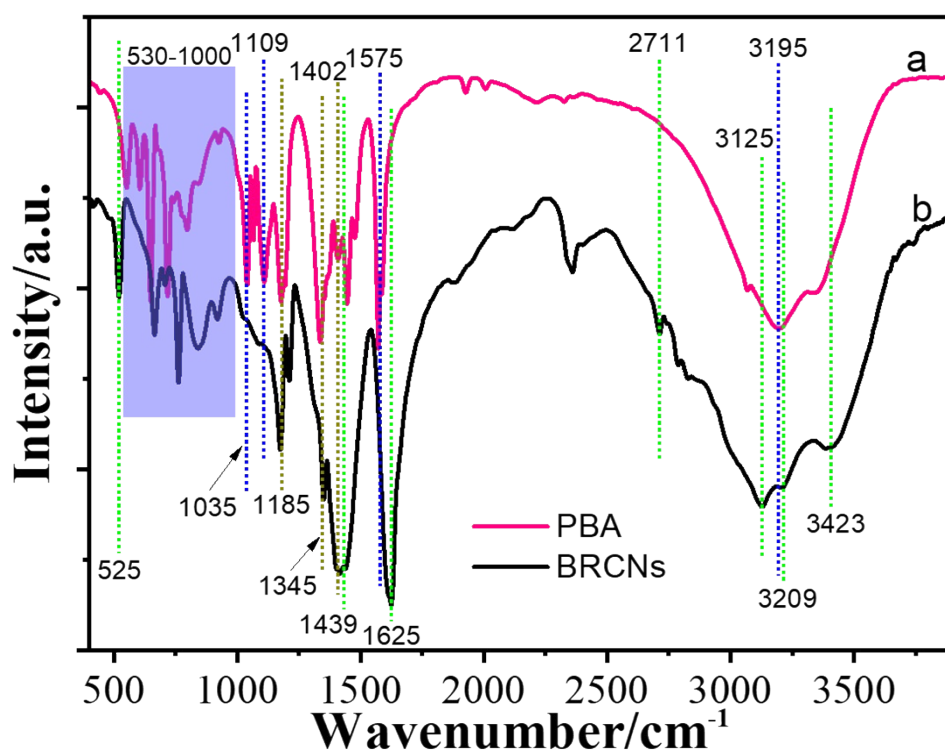

**Figure S3** FT-IR spectra of the PBA (line a) and BRCNs (line b). Green dot-line represents new peaks, the blue dot-line represents disappeared or moved peaks, and the gray dot-line represents coexisting peaks.

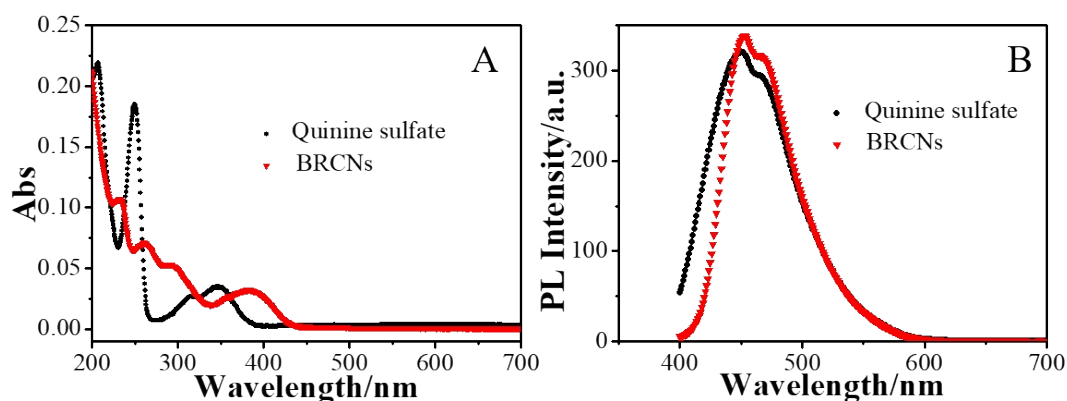

**Figure S4** UV-vis absorption (A) and PL emission spectra (B) excited at 360 nm of BRCNs in water ( $\blacktriangledown$ ) and quinine sulfate ( $\bullet$ ) in 0.1 M  $\text{H}_2\text{SO}_4$  solution as the standard. The asymmetry of BRCNs emission spectra may be caused by the re-absorption in the blue part of the spectra.

#### ***Quantum Yield Measurements.***

Reference on quantum yield measurements: Lakowicz, J. R. *Principles of Fluorescence Spectroscopy*, 2<sup>nd</sup> Ed., 1999, Kluwer Academic/Plenum Publishers, New York. The optical densities were measured on a Shimadzu UV-2550 spectrophotometer (Tokyo, Japan) in the range of 200-700 nm. Quinine sulfate in 0.1 M  $\text{H}_2\text{SO}_4$  (literature quantum yield 0.54 at 360 nm) was chosen as a standard. Absolute values are calculated using the standard reference sample that has a fixed and known fluorescent quantum yield value, according to the following equation:

$$\Phi_x = \Phi_s \left[ \frac{Fu}{Au} \right] \left[ \frac{As}{Fs} \right] \left[ \frac{\eta_u}{\eta_s} \right]^2$$

where  $\Phi$  is the quantum yield,  $Fu$  and  $Fs$  are the measured integrated emission intensity of BRCNs and quinine sulfate, respectively.  $Au$  and  $As$  are the optical density of BRCNs and quinine sulfate, respectively. and  $\eta_u$  and  $\eta_s$  are the refractive index of BRCNs and quinine sulfate, respectively. In order to minimize re-absorption effects absorbencies in the 10 mm fluorescent cuvette were kept under 0.05 at the excitation wavelength (360 nm).

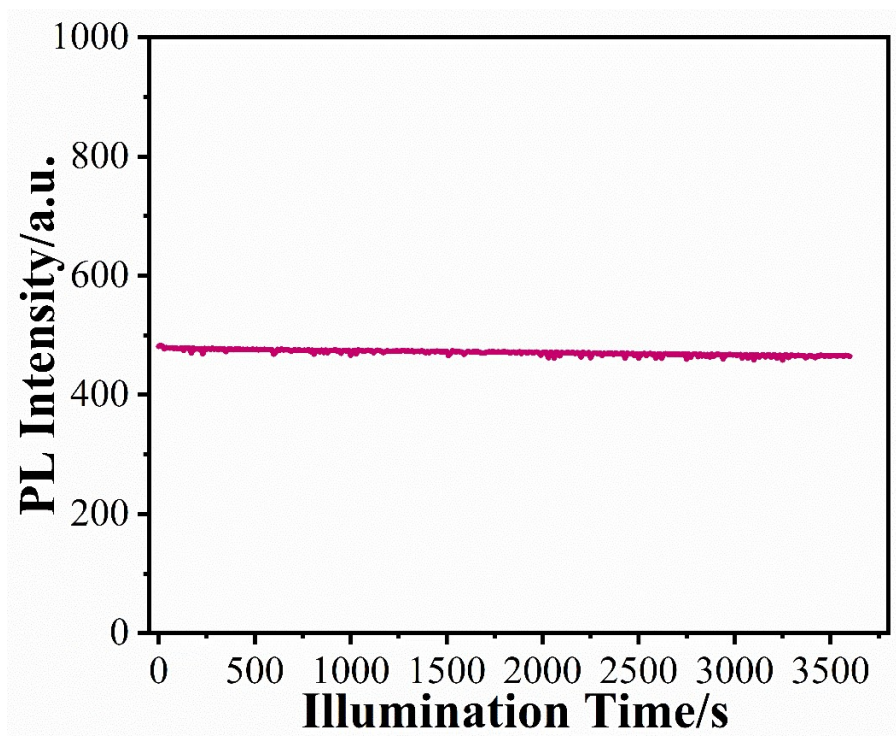

**Figure S5** Photostability of BRCNs solution upon excitation for 60 min at room temperature.

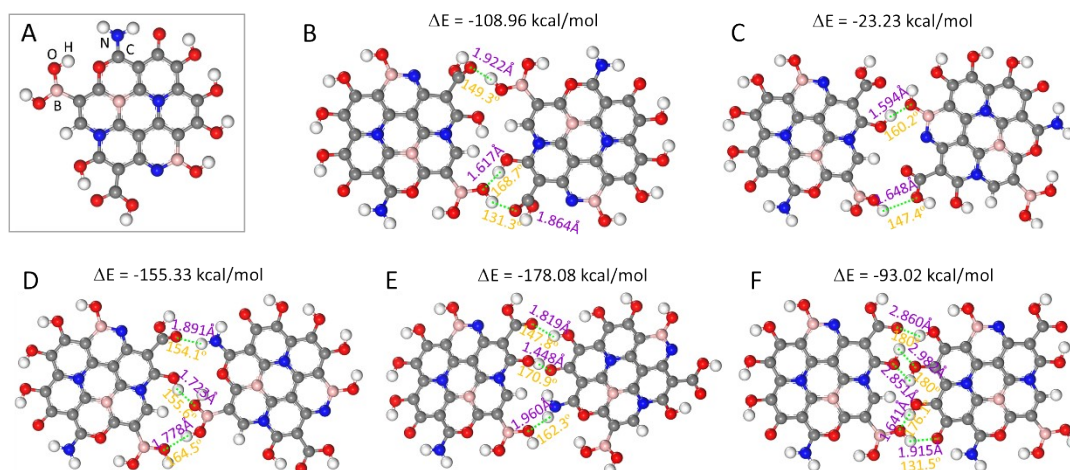

**Figure S6** A) Representative functional section of denatured BRCNs (The BRCNs is reacted with OH<sup>•</sup> radicals) for calculation of H-bond properties; B-F) RB3LYP-optimized H-bonding force geometries between denatured BRCNs. Intermolecular hydrogen bonding forces are displayed as green dotted lines.

To prove the formation of H-bonds between denatured BRCNs, density functional theory (DFT) was performed. By calculating representative functional section groups on the surface of denatured BRCNs (Figure S6A, the roughly representative functional groups are generally obtained according to the characterization of material surface properties), the representative angles and lengths of H-bonds testified to the presence of the nine strong H-bonding forces between the denatured BRCNs (Figure S6B-S6F). Meanwhile, all the energy values were obtained using the optimized geometries of the nanomaterial. From Figure S6B-6F, the data showed that the  $\Delta E$  of the hydrogen bonding-based nanohybrid between the denatured BRCNs were all lower than zero, suggesting denatured BRCNs prefers to produce aggregation through strong intermolecular H-bonding forces.

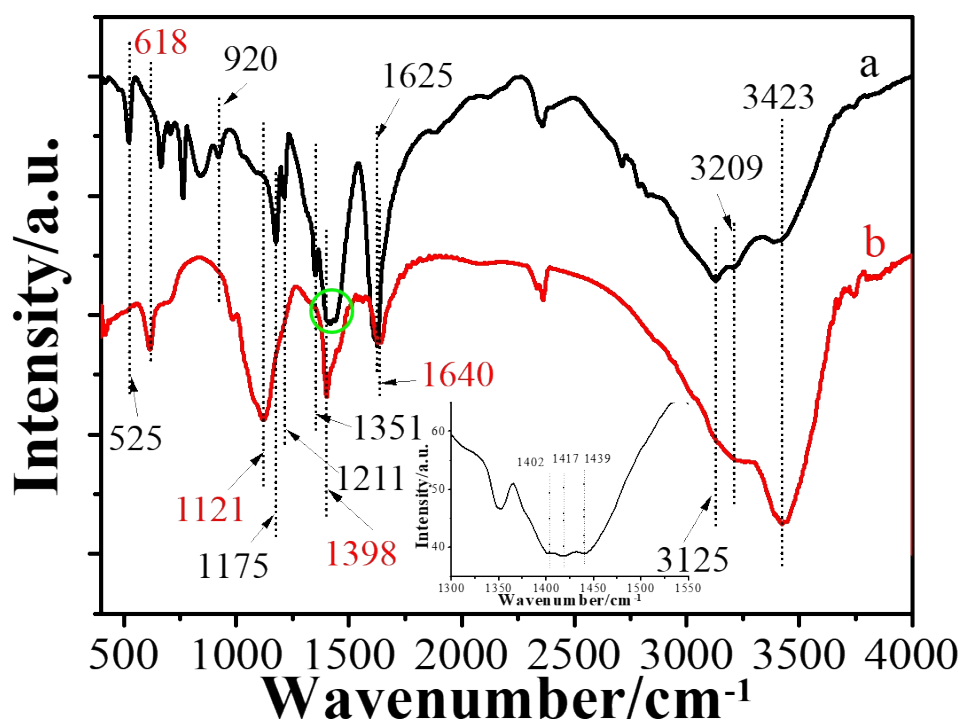

**Figure S7** FT-IR spectra of the BRCNs in the absence (line a) and simultaneous presence of Fe<sup>2+</sup> ion (200 μM) and H<sub>2</sub>O<sub>2</sub> (50 μM) (line b); The inset below is an enlarged version of a bright green circle.



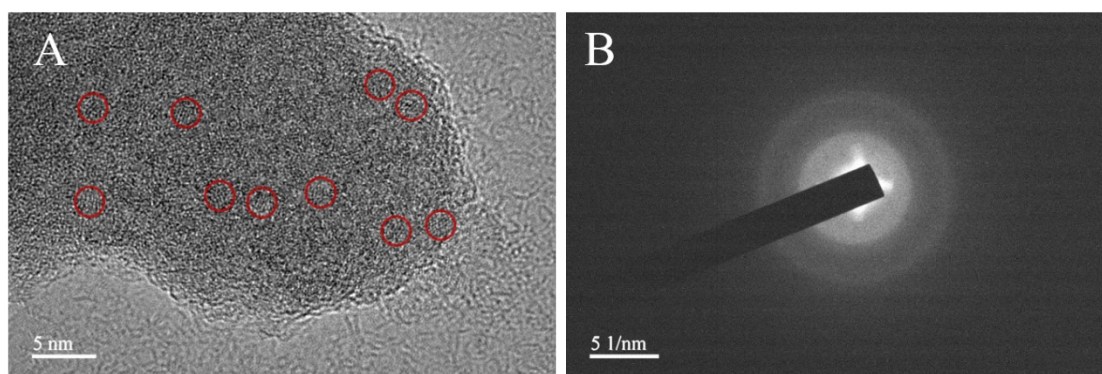

**Figure S8** HRTEM (A) and SAED (B) images of the BRCNs in the presence of  $\text{Fe}^{2+}$  ion (200  $\mu\text{M}$ ) and  $\text{H}_2\text{O}_2$  (100  $\mu\text{M}$ ). The red circle in Figure S5A is the position of the denatured BRCNs.

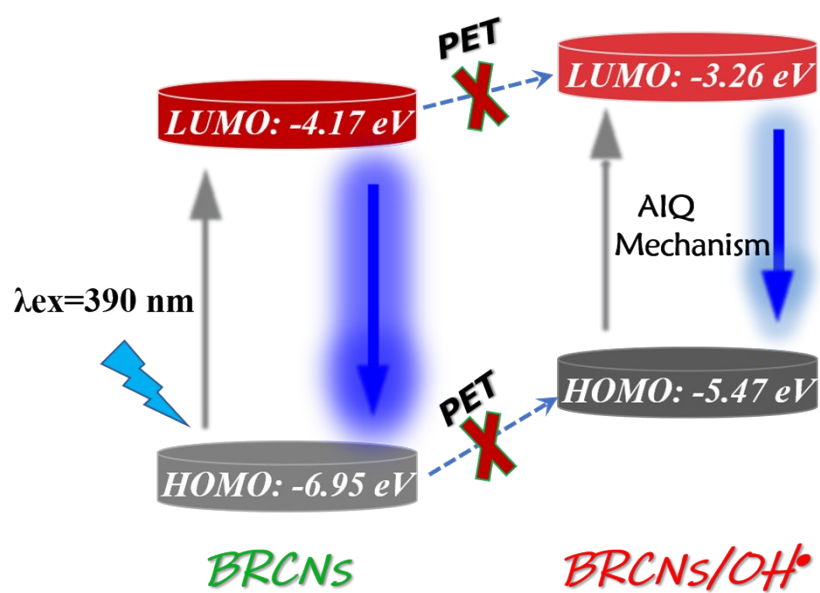

**Figure S9** Schematic of PET process from BRCNs to OH• radicals.

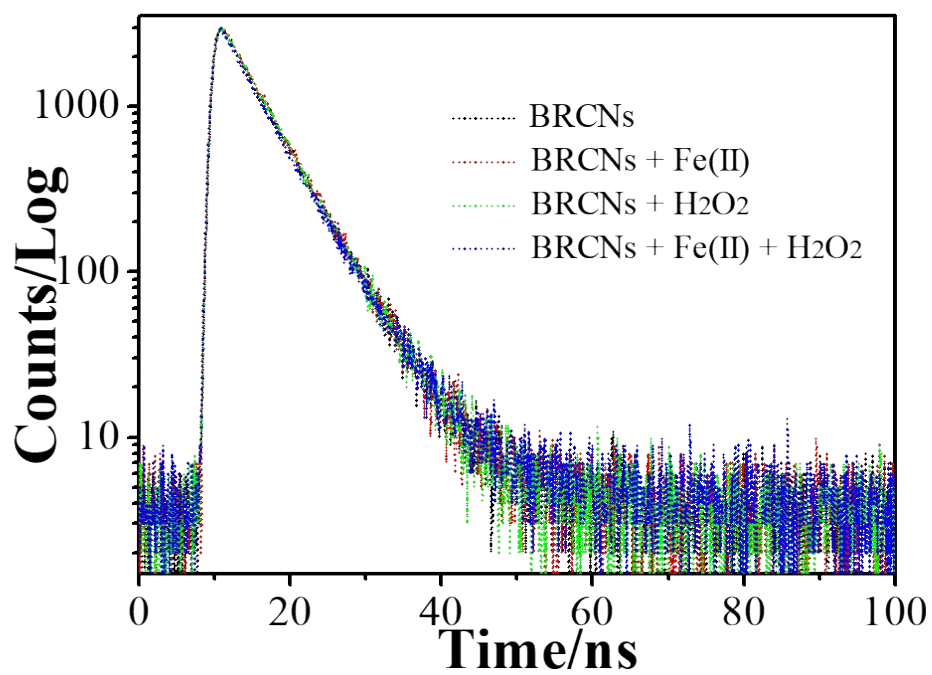

**Figure S10** Decay of the PL of the BRCNs in the absence and presence of Fe<sup>2+</sup> ion (200  $\mu$ M), H<sub>2</sub>O<sub>2</sub> (30  $\mu$ M) and simultaneous presence of Fe<sup>2+</sup> ion (200  $\mu$ M) and H<sub>2</sub>O<sub>2</sub> (30  $\mu$ M).

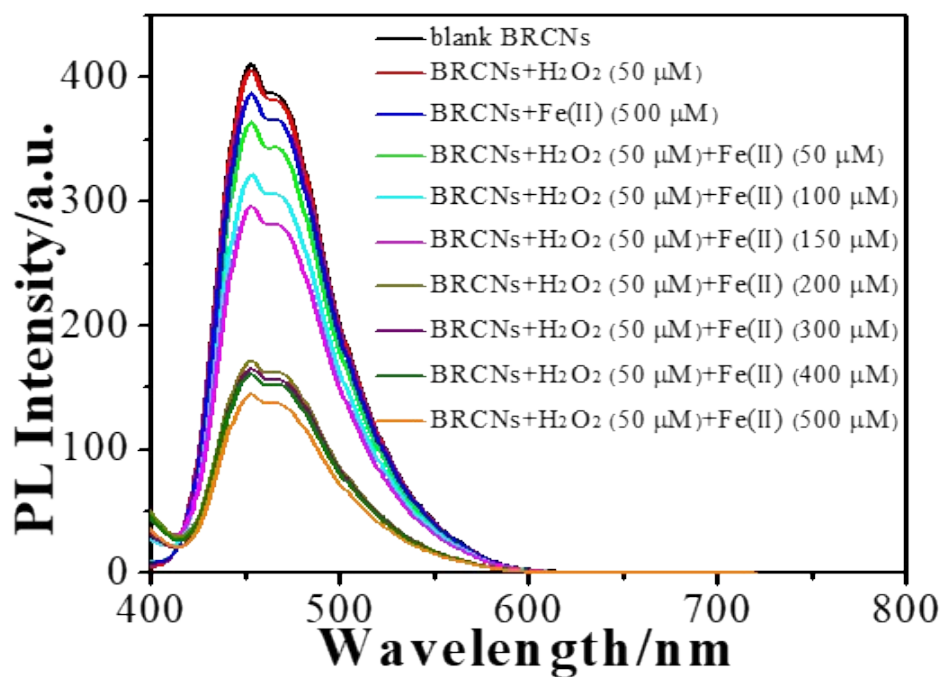

**Figure S11** The PL spectra of the BRCNs in the presence of 50 μM H<sub>2</sub>O<sub>2</sub> and various concentrations of Fe<sup>2+</sup> ions (0 to 500.0 μM, top to bottom, excitation at 390 nm).

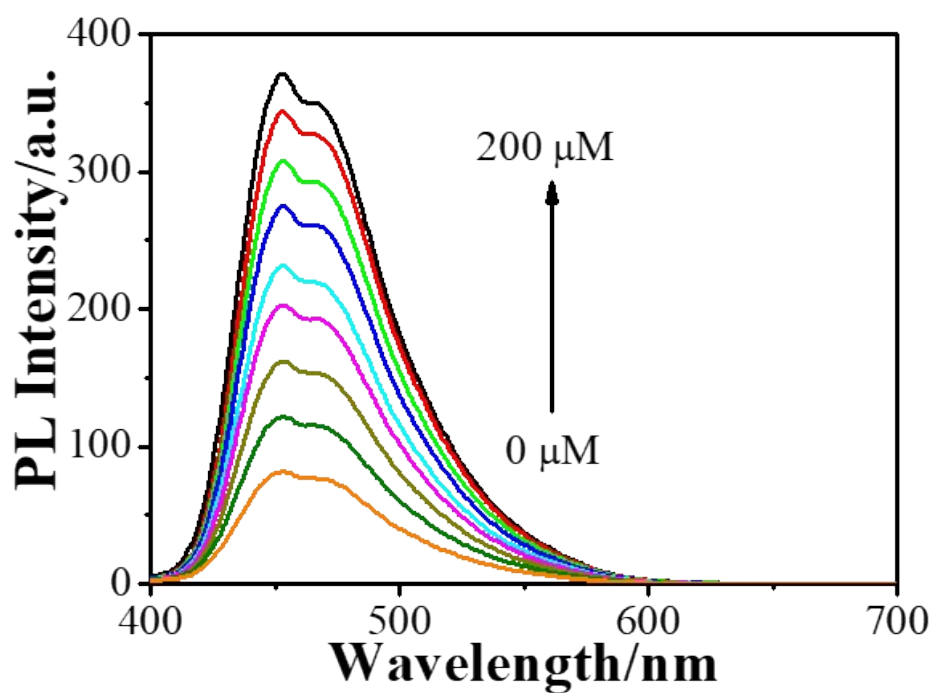

**Figure S12 A)** PL spectra of BRCNs after exposure to Fenton's reagent (200  $\mu\text{M}$   $\text{Fe}^{2+}$  ion, 80  $\mu\text{M}$   $\text{H}_2\text{O}_2$ ) in the presence of various amounts of Vitamin C (ascorbic acid), the Vitamin C concentrations were (from bottom to top): 0, 5.0, 25, 50, 75, 100, 150 and 200  $\mu\text{M}$ .

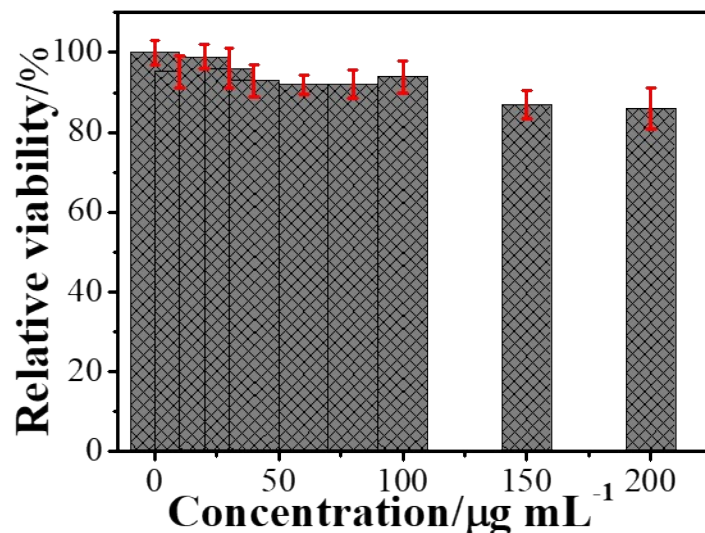

**Figure S13** Viability of HeLa cells incubated with different concentrations of BRCNs (0, 10, 20, 30, 40, 60, 80, 100, 150 and 200  $\mu\text{g mL}^{-1}$ ) for 6 h. Data are mean  $\pm$  SD (bars) (n = 3).

The study of cytotoxicity for checking the cytocompatibility of BRCNs was conducted using MTT (3-(4,5-dimethyl-2-thiazolyl)-2,5-diphenyl-2H-tetrazolium bromide) assay. In brief, HeLa cells were dispersed on 96-well plates and cultured in 100  $\mu\text{L}$  of Dulbecco's Modified Eagle Medium (DMEM) containing 10% fetal bovine serum in a 5%  $\text{CO}_2$  environment for 24 h. Next, the cells were stained with BRCNs of different concentrations (0, 10, 20, 30, 40, 60, 80, 100, 150 and 200  $\mu\text{g mL}^{-1}$ ) for another 6 h. Then, MTT solution (50  $\mu\text{L}$ , 1  $\text{mg mL}^{-1}$ ) was added to each well, and the cells were incubated for another 4 h (37  $^\circ\text{C}$ , 5%  $\text{CO}_2$ ). And the cells were dissolved in DMSO (150  $\mu\text{L well}^{-1}$ ), and the absorbance at 490 nm was recorded by a Thermo Scientific Varioskan Flash (Thermo Fisher Scientific, USA). All results were repeated for three times. The cell viability was estimated as the percentage of the absorbance of BRCNs treated cells to the absorbance of nontreated cells. The cell viability was estimated according to the follow equation (1):

$$\text{Cell viability (\%)} = \text{OD}_{\text{treated}} / \text{OD}_{\text{control}} \times 100\% \quad (1)$$

Where  $\text{OD}_{\text{control}}$  was obtained in the absence of BRCNs and  $\text{OD}_{\text{treated}}$  was obtained in the presence of BRCNs. Each measurement was performed in triplicate.

Table S1. Comparison of analyte, technology, carbon-based probes, medium, linear range and detect limit for ROS analysis using different detection method based on carbon probe.

| Analyte         | Technology   | Carbon-based probe | Medium         | Linear range | Detect limit | Ref.        |
|-----------------|--------------|--------------------|----------------|--------------|--------------|-------------|
| ROS             | Fluorescence | C-Dots-Hydrogel    | HeLa cells     | -            | 5-FU         | 1           |
| OH <sup>•</sup> | Fluorescence | TPA@GQDs           | HeLa cells     | 0.018-6 μM   | 12 nM        | 2           |
| OH <sup>•</sup> | Fluorescence | C-Ag NPs           | HeLa cells     | 0.25-32 μM   | -            | 3           |
| ROS             | Fluorescence | DHLA@N-CQDs        | HeLa cells     | 0.2-600 μM   | 0.12 μM      | 4           |
| OH <sup>•</sup> | Fluorescence | CCA@TPP@CDs        | RAW264.7 cells | 0.1-160 μM   | 70 nM        | 5           |
| OH <sup>•</sup> | Fluorescence | r-CDs              | -              | 10-40 μM     | -            | 6           |
| OH <sup>•</sup> | Fluorescence | BRCNs              | HeLa cells     | 0.1-75.0 μM  | 57.86 nM     | This method |

**Table S2** The element content of the BRCNs and the BRCNs/Fe<sup>2+</sup> in the presence of H<sub>2</sub>O<sub>2</sub>. The concentrations of Fe<sup>2+</sup> and H<sub>2</sub>O<sub>2</sub> were 200 μM and 50 μM, respectively.

| <b>Atomic species</b> | <b><i>BRCNs</i></b> | <b><i>BRCNs + OH<sup>•</sup></i></b> |
|-----------------------|---------------------|--------------------------------------|
|                       | At%                 | At%                                  |
| <b>B</b>              | 24.68               | 13.29                                |
| <b>C</b>              | 46.88               | 44.24                                |
| <b>N</b>              | 6.90                | 8.27                                 |
| <b>O</b>              | 21.54               | 34.20                                |



Table S3. Comparison of preparation method, probes, mechanism, linear range and detect limit for OH<sup>•</sup> analysis using different detection probes.

| Analyte         | Preparation method     | Probes                   | Mechanism                              | Linear range | Detect limit | Ref.        |
|-----------------|------------------------|--------------------------|----------------------------------------|--------------|--------------|-------------|
| OH <sup>•</sup> | Organic synthesis      | hybrid carbazole-cyanine | Hydrogen abstraction                   | 0-100 equiv  | -            | 7           |
| OH <sup>•</sup> | Organic synthesis      | Rhodamine Nitroxide      | Recombination of nitroxide radicals    | -            | 1 μM         | 8           |
| OH <sup>•</sup> | Organic synthesis      | Organic molecule         | Aromatic hydroxylation                 | 0-60 μM      | 38 nM        | 9           |
| OH <sup>•</sup> | Organic synthesis      | Molecular probe          | Oxidative dearylation                  | -            | 0.04 μM      | 10          |
| OH <sup>•</sup> | Organic synthesis      | MPT-Cy2                  | Oxidation of electron-rich heteroatoms | 1-10 μM      | 1.16 μM      | 11          |
| OH <sup>•</sup> | Organic synthesis      | Cyanostilbene            | Carbon bond breakage                   | 0.1-200 μM   | 0.1 μM       | 12          |
| OH <sup>•</sup> | Ionic crosslinking     | Polymeric NPs            | FRET                                   | -            | -            | 13          |
| OH <sup>•</sup> | Surface modification   | Quantum dots             | PET                                    | 1-200 μM     | 0.97 μM      | 14          |
| OH <sup>•</sup> | Template method        | Metal nanoclusters       | Template cleavage                      | 0.05-5 μM    | -            | 15          |
| OH <sup>•</sup> | Ligand exchange        | Upconversion NPs         | FRET                                   | 4 nM-16 μM   | 2 nM         | 16          |
| OH <sup>•</sup> | Hydrothermal synthesis | BRCNs                    | Aromatic hydroxylation                 | 0.1-75.0 μM  | 57.86 nM     | This method |

Table S4 Results of the determination of OH• radicals in serum samples (n = 3).

| <i>Sample</i> | <i>Analyte</i> | <i>Initial (μM)</i> | <i>Added<sup>a</sup> (μM)</i> | <i>Found<sup>a</sup> (μM)</i> | <i>Recovery (%)</i> | <i>RSD (%)</i> |
|---------------|----------------|---------------------|-------------------------------|-------------------------------|---------------------|----------------|
| 1#            | OH•            | 0                   | 10                            | 9.47                          | 94.70               | 3.87           |
| 2#            | OH•            | 0                   | 20                            | 19.21                         | 96.05               | 2.16           |
| 3#            | OH•            | 0                   | 30                            | 30.62                         | 102.07              | 2.98           |

<sup>a</sup> The data were obtained from three parallel samples.

### Real samples

The bovine serum sample (BSS) was selected as the representative of real sample determination, and was obtained from Shanghai Sangon Biological Co. Ltd. (Shanghai, China). Each BSS was diluted 50-fold with HAc-NaAc buffer (pH 5.4, 10 mM), which was used for subsequent analysis. In brief, 5 μL of 1.65 mg mL<sup>-1</sup> BRCNs solution, 100 μL of the diluted BSS, 100 μL Fe(II) solution (1.0 mM) and various volume of H<sub>2</sub>O<sub>2</sub> standard solution (10, 20, and 30 μM) were sequentially added into a 2.0 mL centrifugal tube, which can be to generate approximately the expected quantity of OH•. After that, the above mixture was diluted to 500 μL with ultrapure water. And the diluted mixture was incubated for 20 min at room temperature, then, the PL emission spectra were recorded at λ<sub>ex</sub>=390 nm. The corresponding calculation rules correspond to the previous description.

## Reference

1. S. Bhattacharya, R. Sarkar, S. Nandi, A. Porgador and R. Jelinek, *Anal. Chem.*, 2017, **89**, 830-836.
2. X. Hai, Z. Guo, X. Lin, X. Chen and J. Wang, *ACS Appl. Mater. Interfaces*, 2018, **10**, 5853-5861.
3. R. Wang, H. Liu, X. Meng, Y. Qian, X. Wang, F. Zhu, R. Nie and H. Wang, *J. Colloid Interf. Sci.*, 2022, **608**, 2672-2680.
4. R. Zhang and Z. Fan, *J. Lumin.*, 2021, **234**, 117998.
5. D. Zhou, H. Huang, Y. Wang, Y. Wang, Z. Hua and X. Li, *J. Mater. Chem., B* 2019, **7**, 3737-3744.
6. J. Yue, K. Zhang, H. Yu, L. Yu, T. Hou, X. Chen, H. Ge, T. Hayat, A. Alsaedi and S. Wang, *J. Mater. Sci.*, 2019, **54**, 6140-6150.
7. J.Y. Wang, Z.R. Liu, M. Ren, X. Kong, K. Liu, B. Deng and W. Lin, *Sensor. Actuat. B-Chem.*, 2016, **236**, 60-66.
8. N.B. Yapici, S. Jockusch, A. Moscatelli, S.R. Mandalapu, Y. Itagaki, D.K. Bates, S. Wiseman, K.M. Gibson, N.J. Turro and L. Bi, *Org. Lett.*, 2012, **14**, 50-53.
9. H. Li, X. Li, W. Shi, Y. Xu and H. Ma, *Angew. Chem. Int. Ed.*, 2018, **57**, 12830-12834.
10. L. Zeng, T. Xia, W. Hu, S. Chen, S. Chi, Y. Lei and Z. Liu, *Anal. Chem.*, 2018, **90**, 1317-1324.
11. F. Liu, J. Du, D. Song, M. Xu and G. Sun, *Chem. Commun.*, 2016, **52**, 4636-4639.
12. N.Y. Lim, J. Ahn, M. Won, W. Choi, J.S. Kim and J.H. Jung, *ACS Appl. Bio Mater.*, 2019, **2**, 936-942.
13. Y. Tong, X. Huang, M. Lu, B.Y. Yu, and J. Tian, *Anal. Chem.*, 2018, **90**, 3556-3562.
14. Q. Zhao, R. Zhang, D. Ye, S. Zhang, H. Chen and J. Kong, *ACS Appl. Mater. Interfaces*, 2017, **9**, 2052-2058.
15. L. Zhang, R.P. Liang, S.J. Xiao, J.M. Bai, L.L. Zheng, L. Zhan, X.J. Zhao, J.D. Qiu and C.Z. Huang, *Talanta*, 2014, **118**, 339-347.
16. Y. Liu, Q. Jia, Q. Guo, A. Jiang and J. Zhou, *Anal. Chem.*, 2017, **89**, 12299-2305.
